# Supplementary material for: Continuous droplet reactor for the production of millimeter sized spherical aerogels
Source: Royal Society of Chemistry journal article supplement (doi:10.1039/c9ra09631k), 2020-01-01
Supplement: c9ra09631k1.pdf [file c9ra09631k1.pdf]

## Supporting Information

### Continuous Droplet Reactor for the Production of Millimeter Sized Spherical Aerogels

*Lukas Thoni, Benjamin Klemmed, Maximilian Georgi, Stefan Klosz, Albrecht Benad, Alexander Eychmüller\**

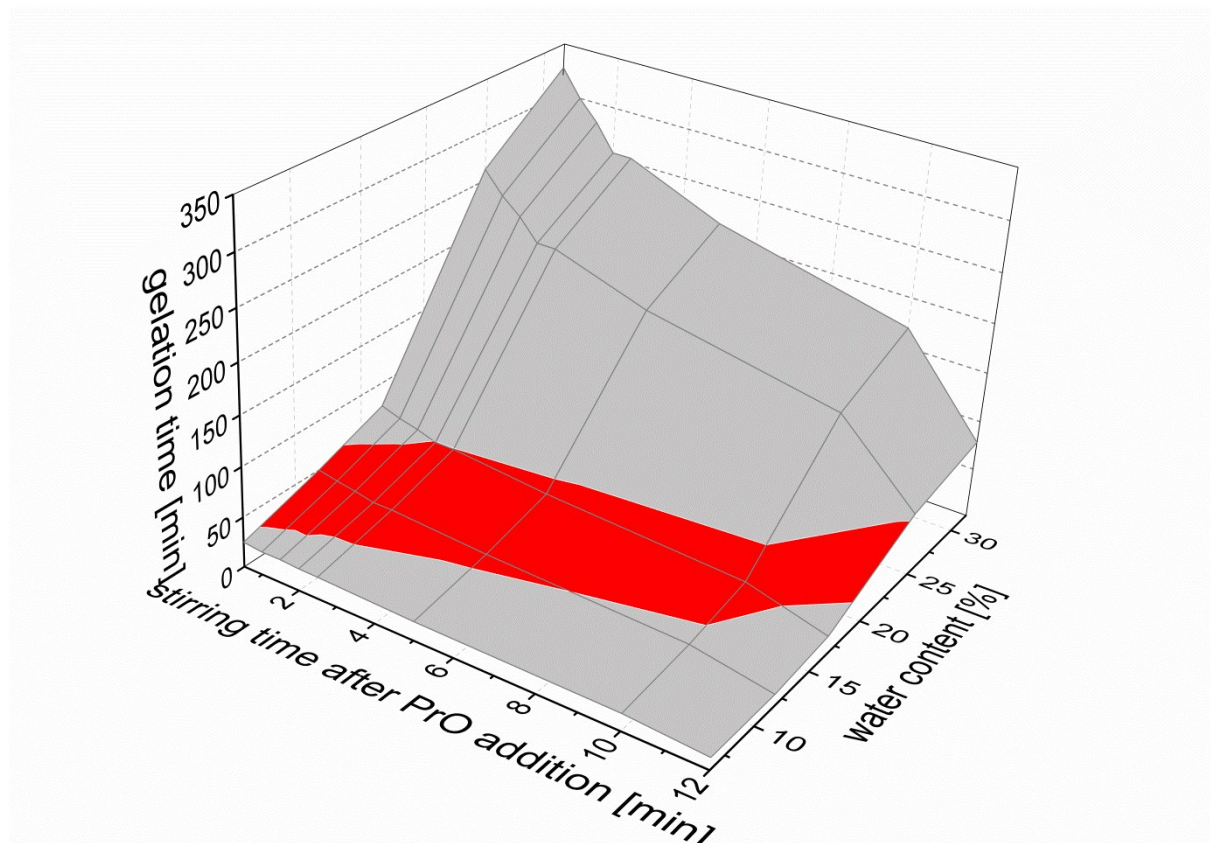

**Figure S1.** Diagram summarizing the dependence of the gelation time of the water content and stirring time between the addition of the gold precursor and the initiation of the gelation by propylene oxide.

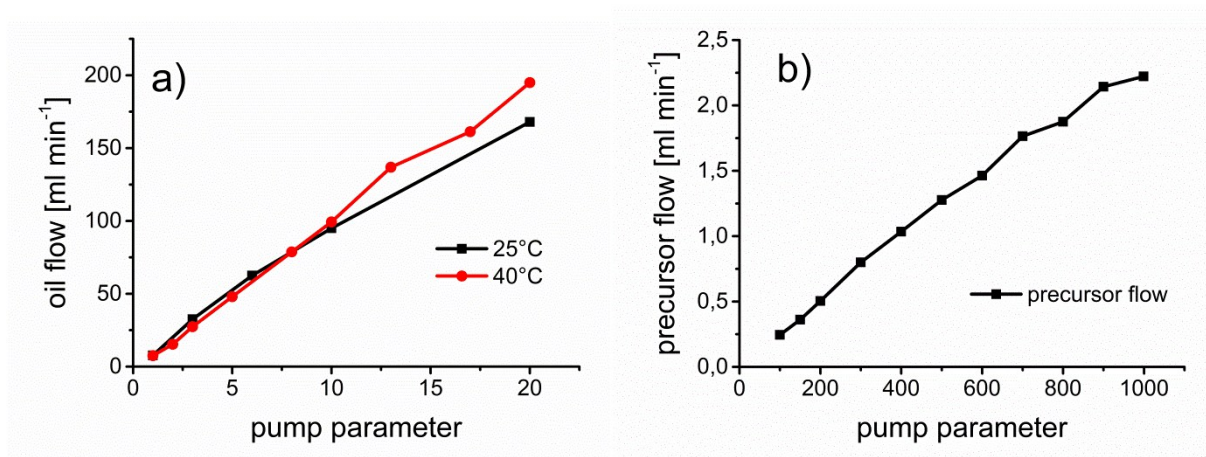

**Figure S2.** Diagram for the determination of flow velocities of a) flow reactor and b) precursor pump.

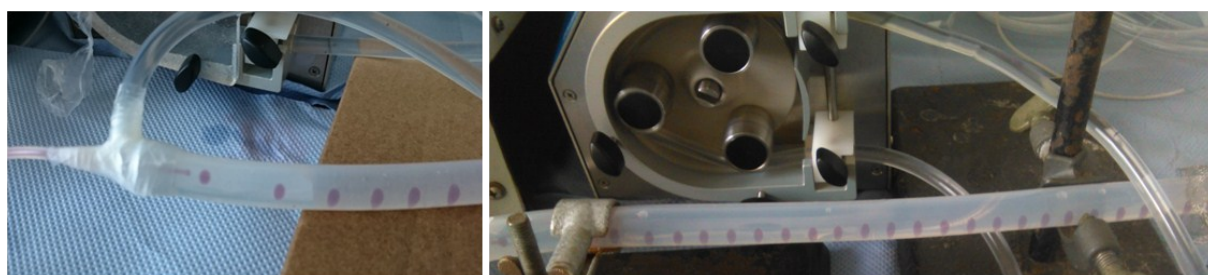

**Figure S3.** Sample photographs of the Au/Al<sub>2</sub>O<sub>3</sub> spheres injected into the oil flow.

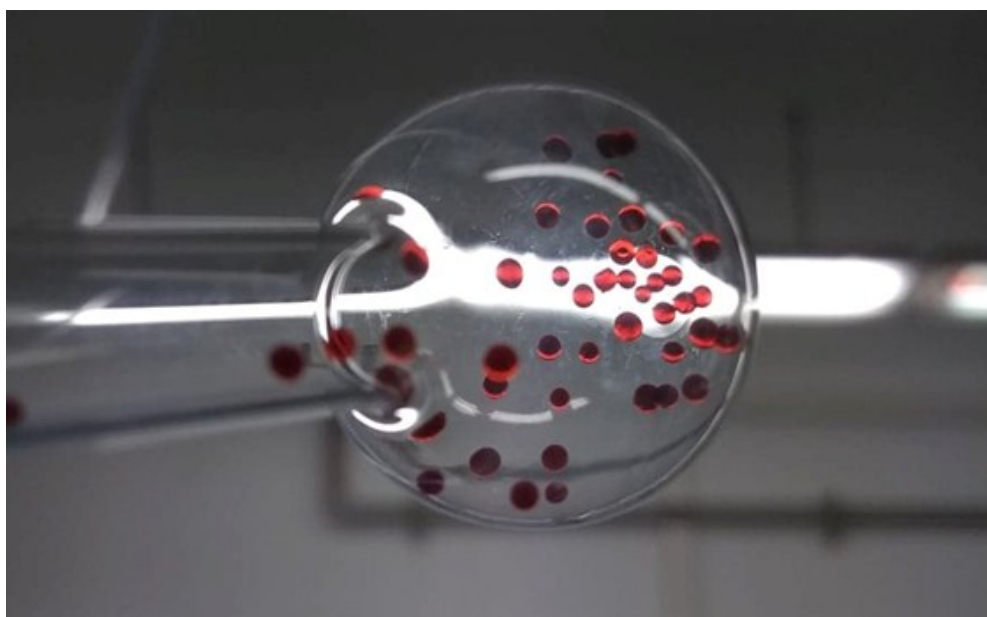

**Figure S4.** Au/Al<sub>2</sub>O<sub>3</sub> aerogel spheres in a BET measurement cell show the transparency of the aerogels.

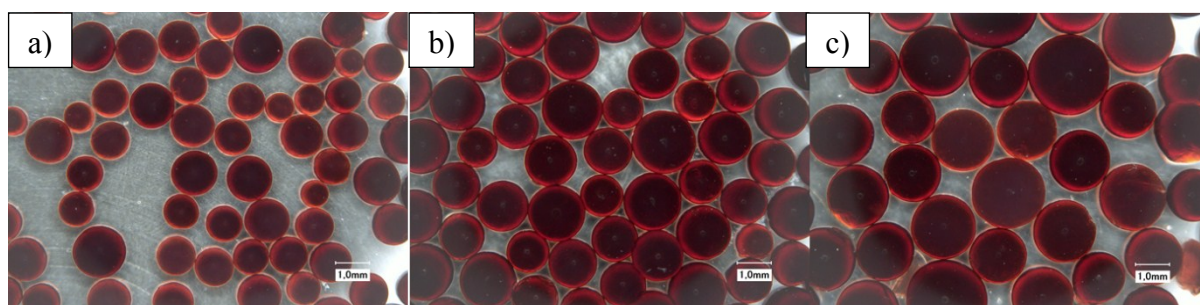

**Figure S5.** Pictures of the dried aerogel spheres with diameters of a) 1,18 mm, b) 1,43 mm and c) 1,90 mm under an optical microscope used to calculate the size distributions
